# Supplementary material
Source: PubMed Central journal article supplement (PMC2937963)
Supplement: supp_M110.156372_jbc.M110.156372-1.pdf [file supp_M110.156372_jbc.M110.156372-1.pdf]

**SUPPLEMENTARY MATERIAL (BUSSMANN ET AL.)**

TABLE S1

*Oligonucleotides used in this study*

| Oligonucleotide                                                                                | Sequence (5' to 3'); restriction sites underlined             | Application                                                                                                        |
|------------------------------------------------------------------------------------------------|---------------------------------------------------------------|--------------------------------------------------------------------------------------------------------------------|
| <i>Oligonucleotides used for construction of plasmids and verification of deletion mutants</i> |                                                               |                                                                                                                    |
| pET2-1324-for                                                                                  | AATAGGATCCGTCCTTTTCGGTGAAAG<br>TGTG                           | PCR amplification of <i>rosR</i> promoter region for construction of pET2- <i>rosR</i>                             |
| pET2-1324-rev                                                                                  | AATAGAGCTCGTGTGTCAAATCACCT<br>ACCCTAG                         |                                                                                                                    |
| narK-RT-1-for                                                                                  | GGTTTCTGCCATCGCTCCCC                                          | PCR amplification of <i>narK</i> fragment used for preparation of a calibration curve for qRT-PCR of <i>narK</i>   |
| narK-RT-2-rev                                                                                  | GTTCGGGCGGGCGTAGTAGA                                          |                                                                                                                    |
| D1-1124                                                                                        | GGTGTTCTAGATGAATTCACC                                         | Primers for construction of pK19mobsacB- $\Delta$ <i>rosR</i> for the chromosomal deletion of the <i>rosR</i> gene |
| D2-1124                                                                                        | CCCATCCACTAAACTTAAGTATTCAGT<br>GGAGAGCCATCGTG                 |                                                                                                                    |
| D3-1124                                                                                        | TACTTAAGTTTAGTGGATGGGCTCACC<br>GCAGTGTGAACTC                  |                                                                                                                    |
| D4-1124                                                                                        | GCGATTTTCCCGGGATGGG                                           |                                                                                                                    |
| D1124-fw                                                                                       | GGAAGCGGTCTTGATAACAACC                                        | Primers used for verification of the <i>rosR</i> deletion by colony PCR                                            |
| D1124-rv                                                                                       | GGTGTCGCGCTGCTTCGCC                                           |                                                                                                                    |
| D1-cg1322                                                                                      | AATCTAGAGCATTTCGGGTTGATTT<br>CC                               | Primers for construction of pK19mobsacB- $\Delta$ cg1322 for the chromosomal deletion of the cg1322 gene           |
| D2-cg1322                                                                                      | CCCATCCACTAAACTTAAGTAGACGG<br>CTCCGCAATCAAGG                  |                                                                                                                    |
| D3-cg1322                                                                                      | TACTTAAGTTTAGTGGATGGGGAGGGT<br>CCAGGTGCCAGTC                  |                                                                                                                    |
| D4-cg1322                                                                                      | AATCCCGGGTCTTGGCACATGTCTCG                                    |                                                                                                                    |
| Dcg1322-fw                                                                                     | GGTTCTACTGCGGTCCCAAT                                          | Primers used for verification of the cg1322 deletion by colony PCR                                                 |
| Dcg1322-rv                                                                                     | CAATCCCGTTCTACGCAG                                            |                                                                                                                    |
| 1124-NdeI                                                                                      | GGTAGGTCATATGACAACACC                                         | PCR amplification of <i>rosR</i> for construction of pET16b- <i>rosR</i>                                           |
| 1124-XhoC                                                                                      | TAAAAACCCCTCGAGAAAACGC                                        |                                                                                                                    |
| pET28-10HisTEV-fw                                                                              | GACCCATGGGCAGCAGCCATCATCATCA<br>TCATCATCATCATGATTATGATATTCCG  | Construction of pET-TEV                                                                                            |
| pET28-10HisTEV-rv                                                                              | GACCATATGGCCCTGAAAATACAGGTTCTCG<br>GTGGTCGGAATATCATAATCATGATG |                                                                                                                    |
| <i>Oligonucleotides used for qRT-PCR</i>                                                       |                                                               |                                                                                                                    |
| narK-RT-3-for                                                                                  | GTGGCTTCTCACACTCGCTG                                          | primers used for qRT-PCR of <i>narK</i>                                                                            |
| narK-RT-4-rev                                                                                  | CTGAATTATCGAGACGCCGAG                                         |                                                                                                                    |
| narG-RT-1-for                                                                                  | CACCGTCGGTTCTGAAGGCC                                          | PCR amplification of <i>narG</i> fragment used for preparation of a calibration curve for qRT-PCR of <i>narG</i>   |
| narG-RT-2-rev                                                                                  | CGGTGCCTTCAGGAATGCGG                                          |                                                                                                                    |
| narG-RT-3-for                                                                                  | GCGCTGACCTCTATGTGTGG                                          | primers used for qRT-PCR of <i>narG</i>                                                                            |
| narG-RT-4-rev                                                                                  | CAGTGGTGATCATCTGACGTG                                         |                                                                                                                    |

|               |                       |                                                                                                                                           |
|---------------|-----------------------|-------------------------------------------------------------------------------------------------------------------------------------------|
| gluS-1-for    | CGTCATCCGATTGGGCAGGC  | PCR amplification of cg1426 fragment used for preparation of a calibration curve for qRT-PCR of cg1426 primers used for qRT-PCR of cg1426 |
| gluS-2-rev    | CTTCGCCCGCAGGAATTGGG  |                                                                                                                                           |
| gluS-3-for-LC | CGCGGCATTACTGTCCCAGC  |                                                                                                                                           |
| gluS-4-rev-LC | CTCCGCGGGGTAGAGGTTAG  |                                                                                                                                           |
| 2329-1-for    | GTCTCCTTCGGCCTCGACAC  | PCR amplification of cg2329 fragment used for preparation of a calibration curve for qRT-PCR of cg2329 primers used for qRT-PCR of cg2329 |
| 2329-2-rev    | GCCTGCTTGGTCAAGATGTCC |                                                                                                                                           |
| 2329-3-for-LC | CTCGACACCTTCGGCGACAAC |                                                                                                                                           |
| 2329-4-rev-LC | GTATTCCTCACGGTGGTGCTC |                                                                                                                                           |

*Oligonucleotides for PCR amplification of promoter fragments used for EMSAs*

|                  |                              |                                                                                       |
|------------------|------------------------------|---------------------------------------------------------------------------------------|
| NR-Prom2-for     | AGGCCCCACGCCCGTTCCGCCG       | PCR amplification of the <i>narK</i> promoter                                         |
| NR-Prom2-rev     | CGCCATGCAATTTTCGAGTCCC       |                                                                                       |
| NR-Prom1-for     | GACTTATCCAGCTGAGATGCTTC      | PCR amplification of parts of <i>narK</i> and <i>narG</i> as negative control         |
| NR-Prom1-rev     | AACCGACGGTGCCTTTTCTTAGG      |                                                                                       |
| NR-Prom2-for     | AGGCCCCACGCCCGTTCCGCCG       | PCR amplification of <i>narK</i> promoter fragment A                                  |
| nr-2-E-rev       | GTTGTGTCACGTGATGCCTC         |                                                                                       |
| NR-Prom2-for     | AGGCCCCACGCCCGTTCCGCCG       | PCR amplification of <i>narK</i> promoter fragment B                                  |
| nr-2-A-rev       | CATTCACCGTCGTGGAGGAG         |                                                                                       |
| nr-2-B-for       | CTCCTCCACGACGGTGAATG         | PCR amplification of <i>narK</i> promoter fragment C                                  |
| nr-2-B-rev       | GTCATCGTTGTGTCTGATCG         |                                                                                       |
| nr-2-C-for       | CGATCAGACACAACGATGAC         | PCR amplification of <i>narK</i> promoter fragment D                                  |
| nr-2-C-rev       | CGTGATTCGGCAAATAATTAACCTG    |                                                                                       |
| nr-2-D-for       | CAGTTTAATTAATTTTGCCGAATCACG  | PCR amplification of <i>narK</i> promoter fragment E                                  |
| nr-2-D-rev       | CCCGCATGTTTTTCAACGGG         |                                                                                       |
| nr-2-E-for       | CCCGTTGAAAACATGCGGG          | PCR amplification of <i>narK</i> promoter fragment F                                  |
| nr-2-E-rev       | GTTGTGTCACGTGATGCCTC         |                                                                                       |
| nr-2-C-for       | CGATCAGACACAACGATGAC         | PCR amplification of <i>narK</i> promoter fragment G                                  |
| nr2-x1           | CGAATTTGTGCTTATATCAACATTCGTG |                                                                                       |
| nr2-x1           | CGAATTTGTGCTTATATCAACATTCGTG | mutation of the <i>narK</i> promoter region                                           |
| nr2-mut1         | CGAAAAAGTGCTTATATCAACATTCGTG |                                                                                       |
| nr2-mut2         | CGAATTCACCTTATATCAACATTCGTG  |                                                                                       |
| nr2-mut3         | CGAATTTGTGGAAATATCAACATTCGTG |                                                                                       |
| nr2-mut4         | CGAATTTGTGCTTTATTCAACATTCGTG |                                                                                       |
| nr2-mut5         | CGAATTTGTGCTTATAAGTACATTCGTG |                                                                                       |
| nr2-mut6         | CGAATTTGTGCTTATATCATGTTTCGTG |                                                                                       |
| nr2-mut7         | CGAATTTGTGCTTATATCAACAAACGTG |                                                                                       |
| cg1324-for       | GCCCTTAACGTGTGCATCGC         | PCR amplification of <i>rosR</i> promoter region                                      |
| cg1324-rev       | GAGTTGTTGCTCTTCAGTGGAG       |                                                                                       |
| cg1324-for       | GCCCTTAACGTGTGCATCGC         | PCR amplification of RosR binding site a in <i>rosR</i> promoter for $K_D$ evaluation |
| cg1324_Bind1_rev | ATTCACGCCTCCACCTGCGGG        |                                                                                       |

|                                                                  |                                                                                                    |                                                                                                                                   |
|------------------------------------------------------------------|----------------------------------------------------------------------------------------------------|-----------------------------------------------------------------------------------------------------------------------------------|
| cg1324-f2-ohne<br>rev-3                                          | ATTTCTAAAAAACTTGATGTGGAAAC<br>GCTGACCCGTTGCCTCAG                                                   | PCR amplification of RosR<br>binding site b in <i>rosR</i><br>promoter for $K_D$ evaluation                                       |
| NCgl0971-for<br>NCgl0971-rev                                     | CAAATGCGTTGAACAGGATTTTCCG<br>GATGATGGCGATCTTGCTC                                                   | PCR amplification of cg1150<br>promoter, $K_D$ determination                                                                      |
| glut-S_for<br>glut-S_rev<br>gluSt- -Mot-fw                       | GTCGCGTTGCAGGATGTCGTTG<br>GGATCCCGCTGGAACGTCTG<br>CCAAGAGAGGACACCACACAG                            | PCR amplification of cg1426<br>promoter region<br>PCR amplification of cg1426<br>promoter without RosR<br>binding site            |
| gluSt+ Mot-fw                                                    | GTAATATTGTTGACATATCATCTAAAT<br>TTCC                                                                | PCR amplification of cg1426<br>promoter including RosR<br>binding site                                                            |
| cg1426_Fr2_fw<br>glut-S_rev                                      | CCACTTCGTAATATTGTTGACATATCATC<br>GGATCCCGCTGGAACGTCTG                                              | PCR amplification of cg1426<br>promoter for $K_D$ evaluation                                                                      |
| cg1426_Fr3_fw<br>cg1426_Fr4_fw<br>cg1426_Fr5_fw<br>cg1426_Fr1_rv | CACGTCTGCAATCACCCCGAAC<br>ACTGCAGCCACGGCAATCG<br>GCACGGTATTCAGCCGCAG<br>CGAAGTGGAATGAAAATCAACGATTG | Further fragmentation of<br>cg1426 promoter                                                                                       |
| NCgl1580-for<br>NCgl1580-rev<br>NCgl1580-for<br>cg1848-Fr1B-rv   | GGGAACGGAATACGTGGCAC<br>CTTCGGTGGGGGCTTTGCCG<br>GGGAACGGAATACGTGGCAC<br>CTAGCAGTTTTTAATGGATGCGTC   | PCR amplification of cg1848<br>promoter<br>PCR amplification of RosR<br>binding site 1 in cg1848<br>promoter for $K_D$ evaluation |
| cg1848_Fr2D_fw<br>cg1848-rv-B                                    | AACTGCTAGTTTGGTGACATATCAAC<br>AATATAGGCTAAGTGTGTGGTTGG                                             | PCR amplification of RosR<br>binding site 2 in cg1848<br>promoter for $K_D$ evaluation                                            |
| coe420-for<br>coe420-rev<br>Coe420--Mot-fw                       | CGACGAAGACCTGGTCTCATG<br>CGAAGTGTGGTGCAGGGG<br>CTTTTAATAAGTCTGATCAACAACGTG                         | PCR amplification of cg2329<br>promoter<br>PCR amplification of cg2329<br>promoter without RosR<br>binding site                   |
| Coe420 + Mot-fw                                                  | CCCCATATTGTTGATATATCTACAAAC                                                                        | PCR amplification of cg2329<br>promoter including RosR<br>binding site                                                            |
| coe420-rev<br>cg2329-Fr2-fw-B                                    | CGAAGTGTGGTGCAGGGG<br>CACCGCCAAATGAGAACACC                                                         | PCR amplification of cg2329<br>promoter for $K_D$ evaluation                                                                      |
| NCgl2686-for<br>NCgl2686-rev                                     | CGATCCGTTCCGTTGGCAGAC<br>GTCCAGCCTGACCTGCTCC                                                       | PCR amplification of cg3084,<br>promoter, $K_D$ determination                                                                     |
| NCgl2826-for<br>NCgl2826-rev                                     | GCGCCTCATCAGCGGTAACC<br>GCTCGAGAGCGTCGTATGCG                                                       | PCR amplification of cg3237<br>promoter, $K_D$ -determination                                                                     |

*Oligonucleotides used for site-directed mutagenesis of RosR*

|        |                                            |                                                                                           |
|--------|--------------------------------------------|-------------------------------------------------------------------------------------------|
| c1-for | GCGCCTGCGAGACATGTCCCAAGAAC<br>TAGATTGGGAC  | Primers for site-directed mutagenesis of RosR-Cys64 to Ser using pET16b-rosR as template  |
| c1-rev | GTCCCAATCTAGTTCTTGGGACATGTC<br>TCGCAGGCGC  |                                                                                           |
| c2-for | CTTAGTGGCCAAGGTAAATCCGCAG<br>GTGACGCACGAGG | Primers for site-directed mutagenesis of RosR-Cys92 to Ser using pET16b-rosR as template  |
| c2-rev | CCTCGTGCGTACCTGCGGATTTAAC<br>CTTGGCCACTAAG |                                                                                           |
| c3-for | GTTGAACTCCAACACCTCCATTGAGA<br>TCAACAACCAAC | Primers for site-directed mutagenesis of RosR-Cys151 to Ser using pET16b-rosR as template |
| c3-rev | GTTGGTTGTTGATCTCAATGGAGGTGT<br>TGGAGTTCAAC |                                                                                           |

*Oligonucleotides used for primer extension and 5'-RACE experiments*

|                 |                              |                                                 |
|-----------------|------------------------------|-------------------------------------------------|
| IRD800-cg1322-1 | CTTGATTTCGGTGTGTGCAGGGTC     | Oligonucleotides for primer extension of cg1322 |
| IRD800-cg1322-2 | CCTTGTAACCAATTGCGTGGCGAGC    |                                                 |
| IRD800-cg1426-1 | CGTCTGCTGATGCATTTTGTGGGGC    | Oligonucleotides for primer extension of cg1426 |
| IRD800-cg1426-2 | CATCGATGTAGTTGGTATCGCGAACGAA |                                                 |
| IRD800-cg3084-1 | CCGCGAGTCCAGCCTGACCTGCTCC    | Oligonucleotides for primer extension of cg3084 |
| IRD800-cg3084-2 | GTGAAACCGCGGCGGGAAAGTTCATG   |                                                 |
| cg1322-A        | GTGGTCAGGTTGTGGTTTTTC        | Oligonucleotides for primer extension of cg1322 |
| cg1322-B        | GTGTACTCGGTGAATTCACC         |                                                 |
| cg1426-A        | GTCGCGTTGCAGGATGTCGT         | Oligonucleotides for primer extension of cg1426 |
| cg1426-B        | GAACGTCTGCGACGATGCG          |                                                 |
| cg3084-A        | CGATCCGTTTCGGTTGGCAGA        | Oligonucleotides for primer extension of cg3084 |
| cg3084-B        | GAGGACGAGAAAATCTTTTCC        |                                                 |
| cg1324-sp1      | GAAAGAGTAACTAGTACTGC         | Primers for 5' RACE of <i>rosR</i>              |
| cg1324-sp2      | ATTCTGAAGTGGTCAGGTTG         |                                                 |
| cg2329-sp1      | CTCCGATGCCGATGATATCC         | Primers for 5' RACE of cg2329                   |
| cg2329-sp2      | CCCCGACTTTGTCTGCCATC         |                                                 |
| cg1150-sp1      | CGTCGAGGACGGGGAAGTTG         | Primers for 5' RACE of cg1150                   |
| cg1150-sp2      | AATCGGCGATATCAACGAGC         |                                                 |
| cg1848-sp1      | GTGCTCGCCGGTGGCAAAGAC        | Primers for 5' RACE of cg1848                   |
| cg1848-sp2      | CATCGAGGCCTACTTCTTCAG        |                                                 |

---

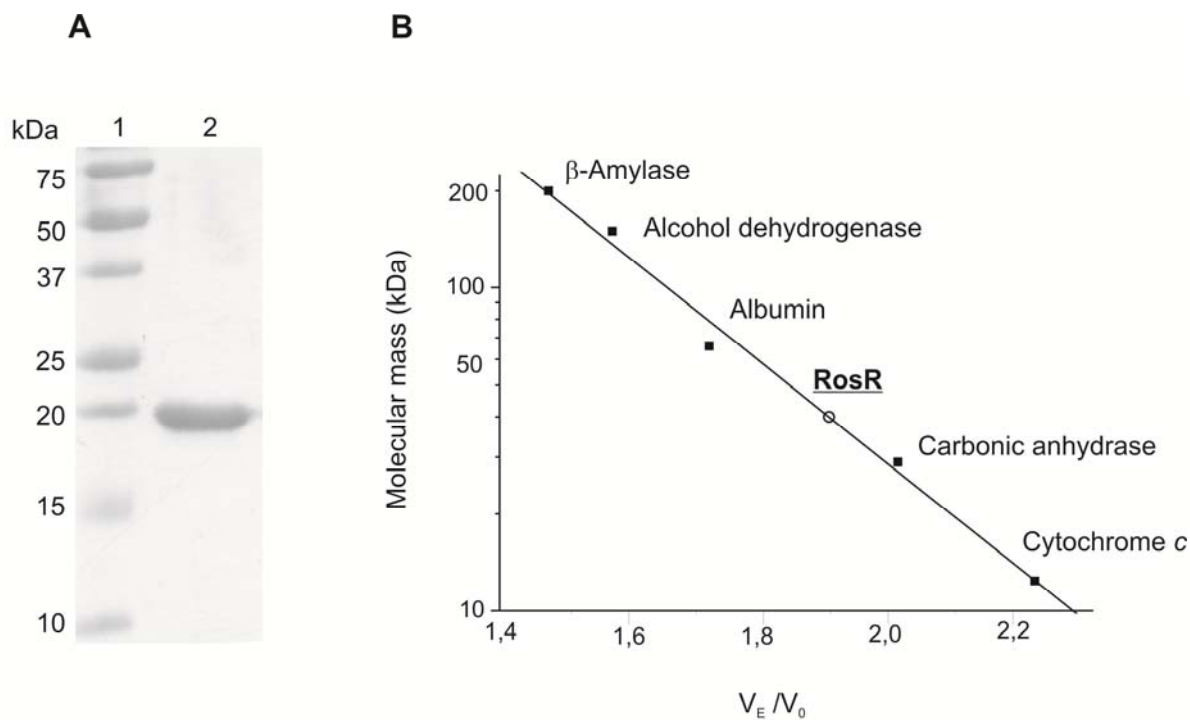

**Fig. S1.** Purification of RosR and determination of its native mass. (A) Coomassie-stained SDS-polyacrylamide gel showing RosR-His (lane 2) after purification by  $\text{Ni}^{2+}$ -NTA affinity chromatography from *E. coli* BL21(DE3)/pLysS carrying the expression plasmid pET16b-RosR. Lane 1 contains protein molecular mass standards. (B) Result of size exclusion chromatography of purified RosR-His using a HiLoad™ 16/60 Superdex™ 200 column (Amersham Biosciences). The column was equilibrated with 20 mM HEPES buffer pH 7.5 containing 500 mM NaCl and elution was performed with the same buffer at 1 ml/min. Calibration was performed with cytochrome *c* (12.4 kDa), carbonic anhydrase (29 kDa), albumin (66 kDa), alcohol dehydrogenase (150 kDa), and  $\beta$ -amylase (200 kDa).  $V_E$ , elution volume of the protein,  $V_0$ , void volume of the column.

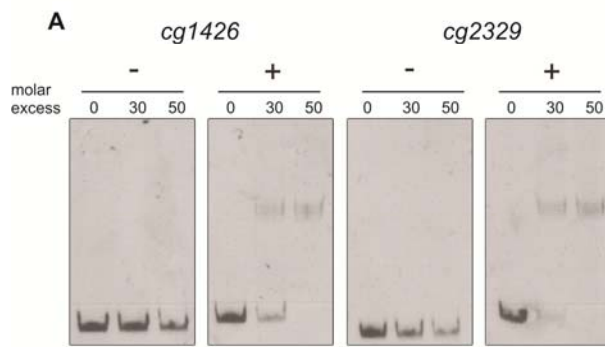

**Fig. S2.** EMSAs with purified RosR protein and the promoter regions of *cg2329* and *cg1426*. DNA fragments (15 nM) of the *cg2329* and *cg1426* promoter regions containing (+) or missing (-) the predicted RosR binding site were incubated either without or with 30- or 50-fold molar excess of purified RosR-His dimer (225 nM or 375 nM, respectively).

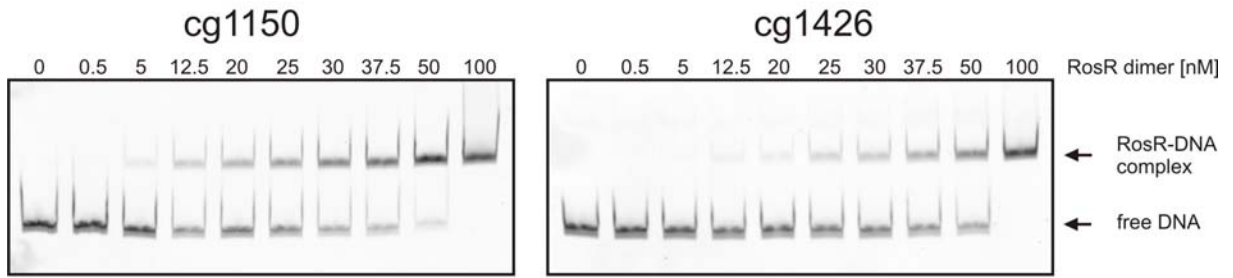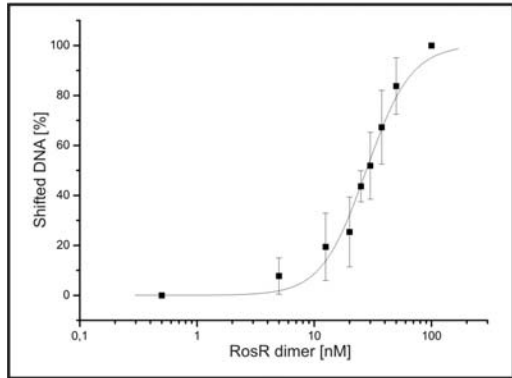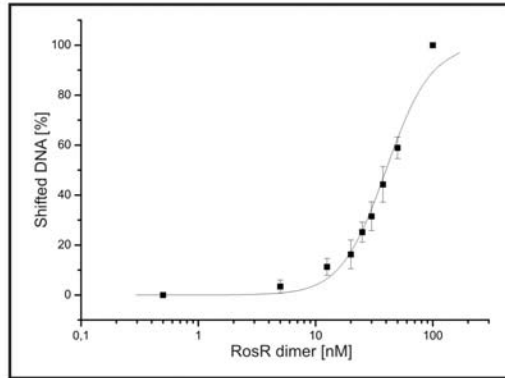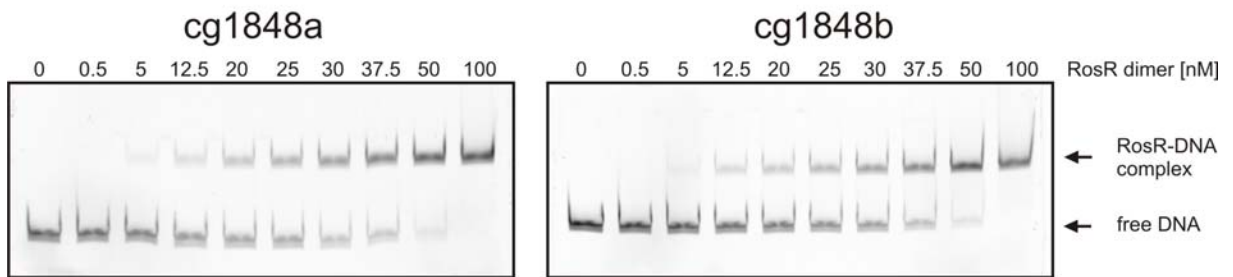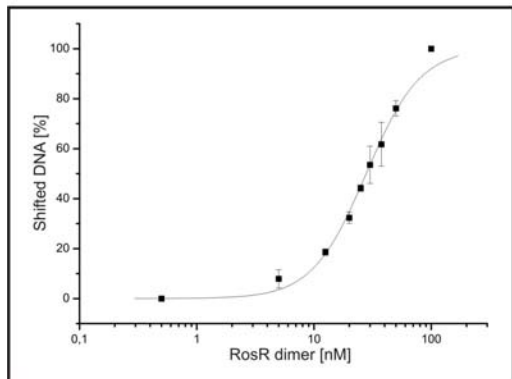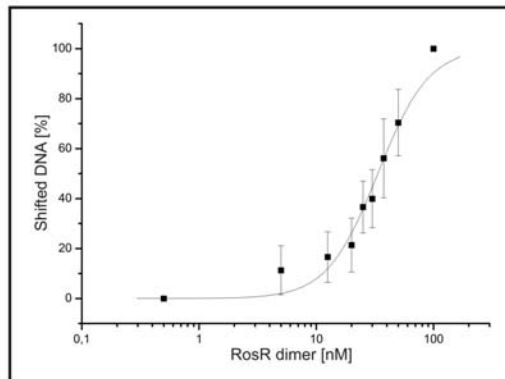

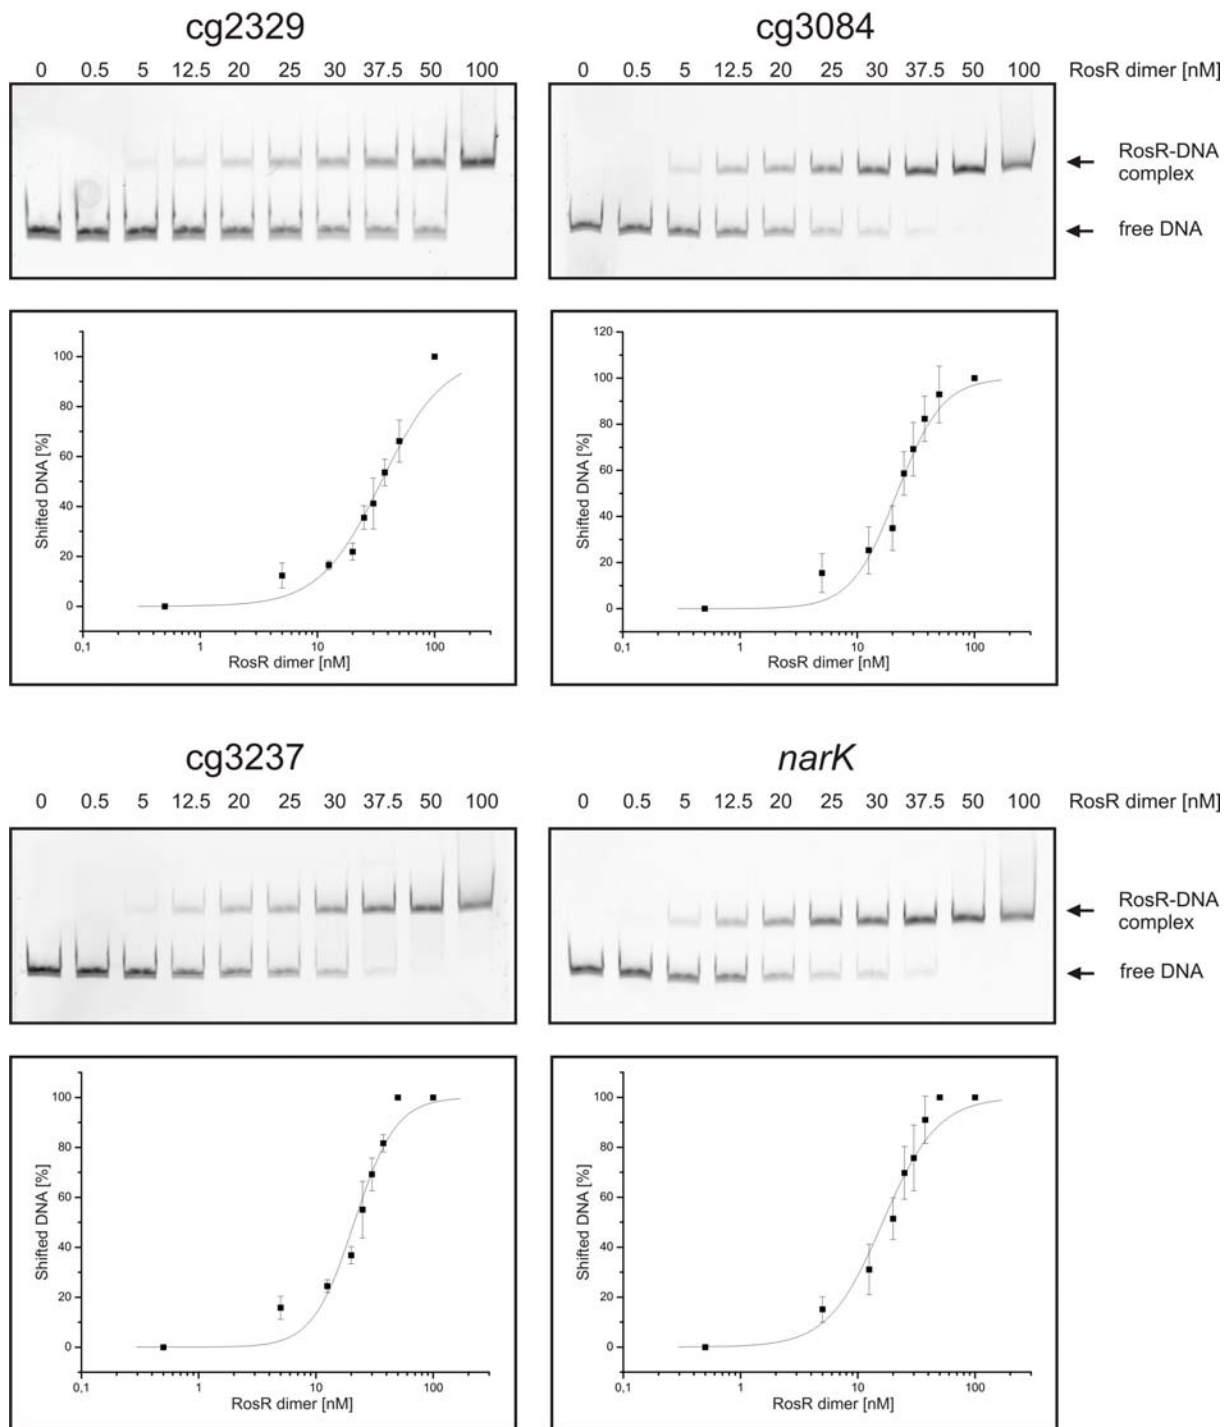

**Fig. S3.** Determination of the apparent  $K_D$  values for RosR-binding sites of all currently known RosR target genes except those for *rosR* itself, which are depicted in Fig. 5. DNA fragments (80 ng), each carrying a single RosR binding site, were incubated with increasing RosR concentrations, resolved on a 10% native polyacrylamide gel and stained with GelRed™. At least three independent gels were performed for each binding site. The bands were quantified using ImageQuant Software (GE Healthcare) and the percentage of shifted DNA was calculated. These values were plotted against the RosR concentration in log<sub>10</sub> scale and a sigmoidal fit was performed. The turning point of the curve was defined as apparent  $K_D$  value.



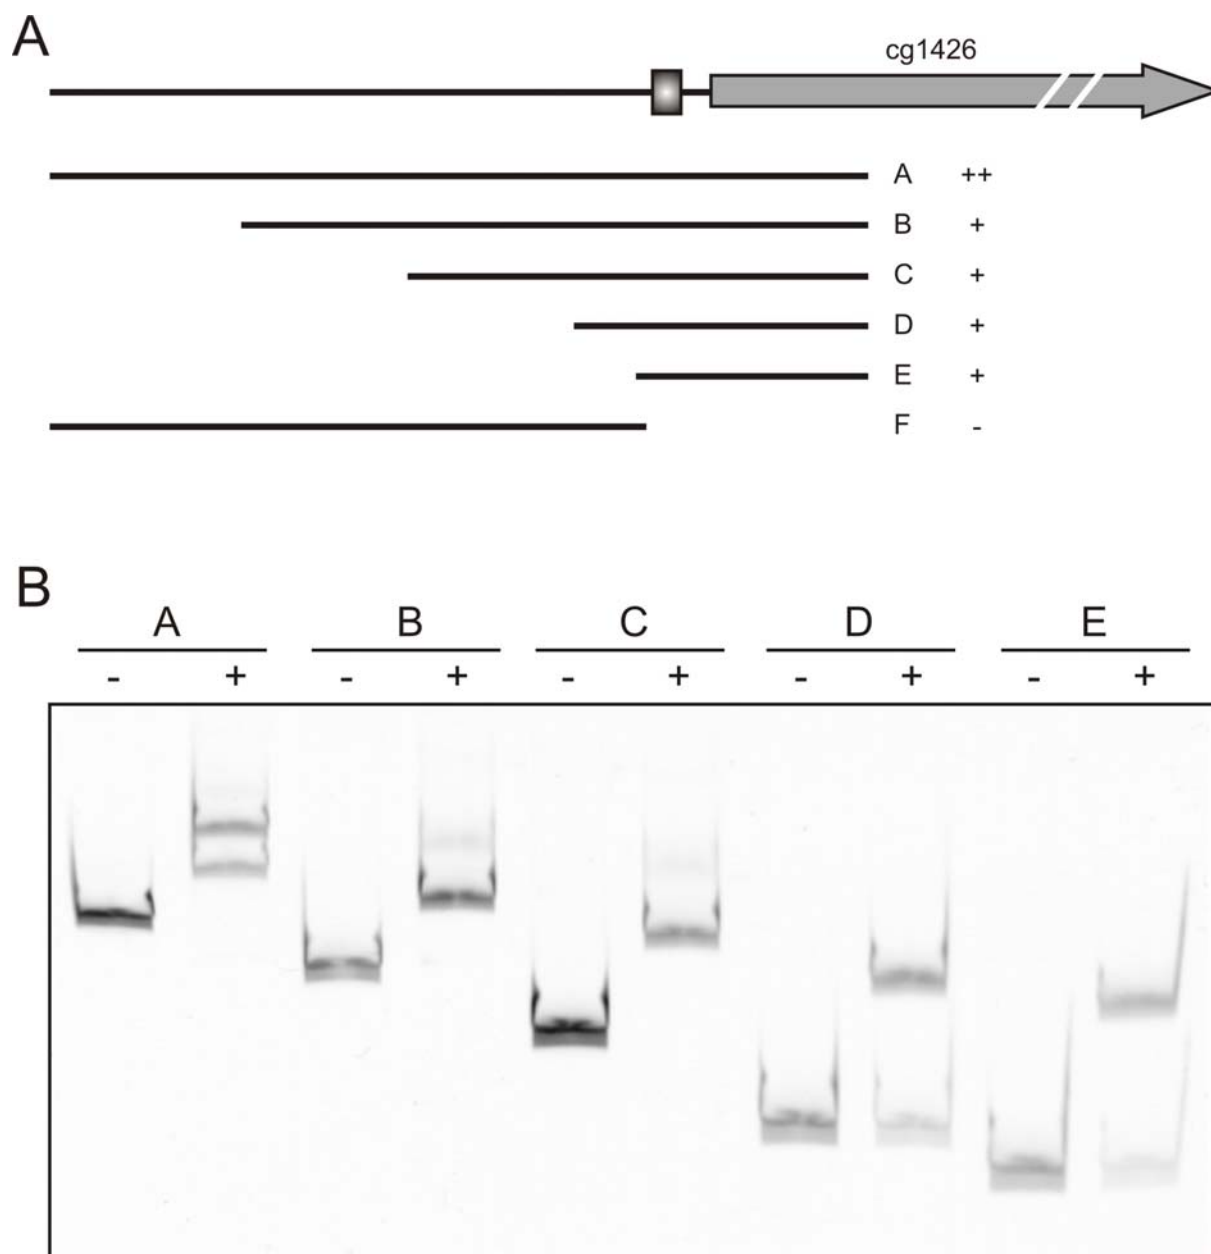

**Fig. S4.** EMSAs with different *cg1426* promoter fragments. A, Scheme of the *cg1426* promoter region showing the position of the confirmed RosR binding site (box) and of fragments A-F used for EMSAs. “++” indicates formation of two RosR-DNA complexes, “+” formation of a single RosR-DNA complex and “-” no formation of a RosR-DNA complex. B, EMSA with fragments A-E. 80 ng of each DNA fragment were incubated either without RosR (-) or with 50 nM of RosR dimer (+) for 20 min at room temperature. Then the samples were separated by native polyacrylamide gel electrophoresis (10%) and the DNA was stained with GelRed™.

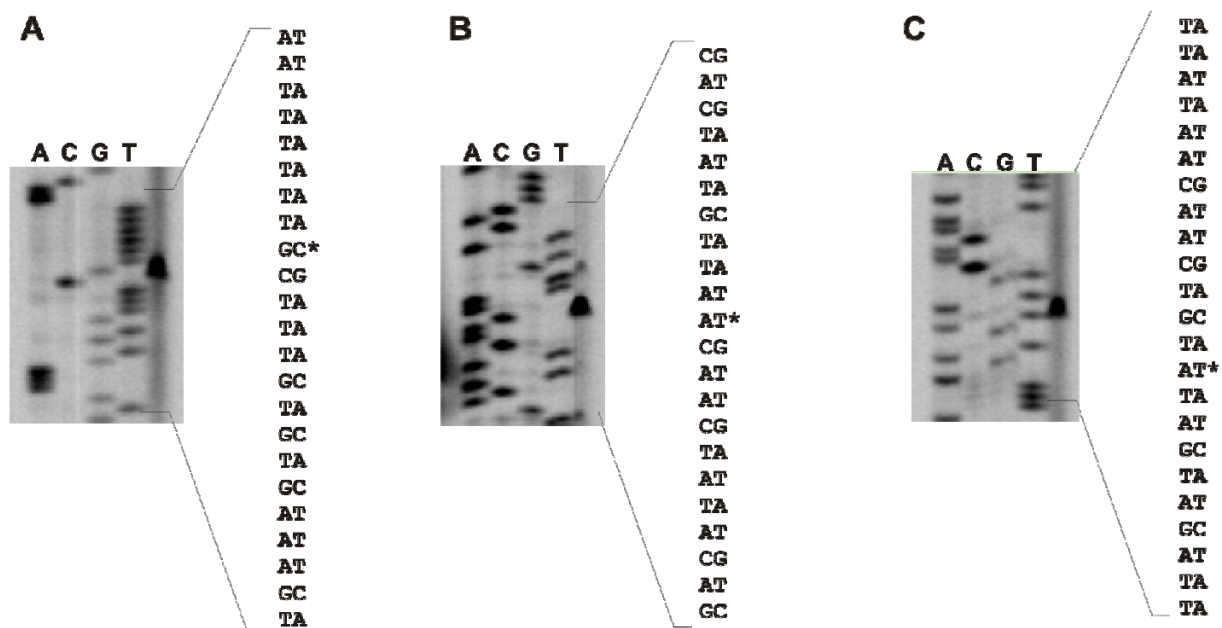

Fig. S5. Determination of the transcriptional start sites of cg1322 (A), cg3084 (B) and cg1426 (C) by primer extension analysis using oligonucleotides cg1322A, cg3084A and cg1426A and total RNA isolated from *C. glutamicum*  $\Delta$ *rosR* cells grown in glucose minimal medium. The residues marked with the star represent the identified transcription start sites.

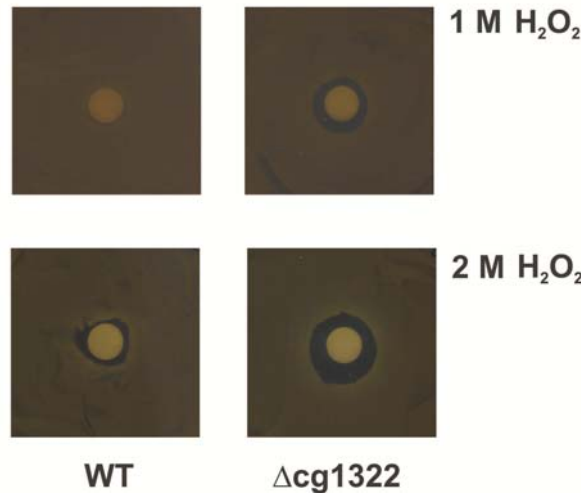

**Fig. S6.** Agar plate assays showing the increased sensitivity of the  $\Delta cg1322$  mutant to hydrogen peroxide. A paper disc impregnated with 70  $\mu$ l of either 1 M or 2 M  $H_2O_2$  was placed on BHI plates containing either  $\Delta cg1322$  or wild-type cells. The plates were incubated at 30°C for 24 h. Experiments were performed in triplicate starting with independent precultures.

**A**

```

C. glutamicum RosR -----MTTPRWLSTBEQQLWRMILSATRKMERTIDETLVENHN 38
C. efficiens Ce1273 -----MTTPRWLNDEQKLRLLLAATRKMDRTIDETLQADHE 38
C. diphtheriae Dip1028 -----MFTRQSAGRGHYVYFPFTDFRSNLNHTTPRWLTQDEQSLWRLFLAMERKVTIRGIDEEIQSSQG 64
C. urealyticum Cu1983 MTRNNSQLTPQGGTGPAPLGAKHNAKDGTAPETQQAVPNPAQDVRWLTDEEQQVWRQWDLGARITNAISREIQLDST 80
C. jeikeium Jk2061 -----MTQEDTSPPLHNDANEGTRWLNREQQVWRRAWINAHIHINAEIQAQLSAETS 52

C. glutamicum RosR LITSEFAVLVLSSEATGQMRLRDMCOELDWDRSRNSHQVTRMDKRGLVAKVKCAGDARGVNVETPEGERRLKDAWPAH 118
C. efficiens Ce1273 LITSEYSVLVLSSEAGDQEMRLRDLCTALEWDRSRNSHQITRMORRGLVAKVKCEGDARGVIVETPEGERRLKCAWPAH 118
C. diphtheriae Dip1028 LITPEFSLVLSSEAPGHEIRLRDLCESELDWDRSRNSHQITRMORRGLVAKVKCSDDARGVIVETPEGERRLKREAWPAH 144
C. urealyticum Cu1983 ISLADYEVLVLSSEAPDHRCRVVALAEAIKWRSRNSHQITRMAKRGVLRREA CDKDCRGAFVHLEEHGLEAITAAWPAH 160
C. jeikeium Jk2061 ISLADYEVLVLSSEAPDHQCRIVALANMMQWSRSRNSHQITRMSKRGVLRRTTCDADCRGAYVVIPEAGLEAITAAWPAH 132

C. glutamicum RosR VETVRELVFDPMEERHMEGLRSYLTAVLNSNTCIEINNQRAAEL----- 162
C. efficiens Ce1273 VETVRELVFDPMEPEQADVLRDYLTAALNSGACDTTGDADALDG----- 162
C. diphtheriae Dip1028 VDVRRLIFDVMTEEEAAVLRGYFQKVIDVQCAGSTGNPLDD----- 186
C. urealyticum Cu1983 VEAVRHMMFDGLSAEQLAARVDVLAHIEPQVADQEEERIAAALATKRRRGKAQS 213
C. jeikeium Jk2061 VAKVRELVFDQLSDAEIEQFYELAKLNGKP----- 163

```

**B**

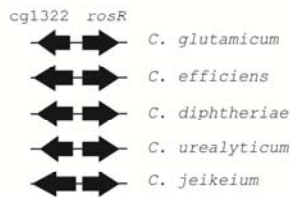

**Fig. S7.** (A) Amino acid sequence alignment of RosR homologs (cysteine residues marked by red boxes) and (B) genomic organisation of *rosR* and *cg1322* homologs in different corynebacteria.
